# Supplementary material
Source: ML conference proceedings conference paper supplement (https://openreview.net/forum?id=8LPXeGhhbH)
Supplement: supplementary_material [file attachment]

## 527 **A Real-Robot Rollouts**

528 Dynamic videos of real-robot rollouts can be found in the supplementary video and at our anonymous  
529 website: <https://retrieval-manipulation-anon.github.io/>.

## 530 **B Data Collection and Affordance Extraction**

### 531 **B.1 Robotic Data**

532 We adopt DROID [2] as our source of robotic data, which includes 76,000 expert trajectories of robots  
533 conducting daily tasks, along with corresponding task instructions. To extract affordance information  
534 from DROID, we first query instructions for tasks of interest. For example, for the task "open the  
535 drawer," we perform a hard search to filter out instructions that do not include the action "open" and  
536 the object "drawer."

537 Next, the filtered instructions are sorted based on the L2 distances between their language embeddings  
538 and the query embedding. We generate these embeddings using the "text-embedding-3-small"  
539 model of OpenAI. Based on the sorted instructions, we then select the Top- $k$  episodes for further  
540 affordance extraction.

541 To extract affordance information from these selected episodes, we identify the cartesian position  
542 when the gripper is closed as the 3D contact point. We then track the gripper's position for the  
543 following 10 time steps or until the gripper stops moving for consecutive steps. This provides us with  
544 the 3D post-contact trajectory. Using the provided camera parameters, we project the 3D contact point  
545 and the post-contact trajectory onto the first frame of each episode where the object is unobscured.  
546 Note that some affordance demonstrations are further refined manually by adding an offset or being  
547 removed due to inaccurate camera parameters. Should accurate camera calibration be available, the  
548 manual correction is not necessary.

549 This method ensures a precise and reliable extraction of affordance information from the DROID [2]  
550 dataset. Note that this method can also adapt to other robotic datasets (real-world or synthetic), such  
551 as [1, 3, 4].

### 552 **B.2 HOI Data**

553 In addition to the details in the main text, we further note that we only average the hand keypoints  
554 within the object mask to determine the contact point and shift the post-contact trajectory accordingly.  
555 This ensures that the contact point is within the object for robust affordance transfer.

556 Note that this affordance extraction procedure can also be applied to other data sources where hand-  
557 object interactions are involved, such as more HOI datasets [5, 6, 7], vast amounts of unannotated  
558 human egocentric videos on the Internet, and user-provided demonstrations.

### 559 **B.3 Custom Data**

560 The annotation process for custom data affordance has been discussed in the main text. Additionally,  
561 the sources of custom data are highly diverse and configurable. For our experiments, we annotated  
562 object images of our interest obtained by simply searching from the Internet (Google, YouTube, etc.).

563 Notably, custom data can also come from a variety of sources, ranging from user-captured images,  
564 cartoon images, AI-generated content, and even sketches, etc., demonstrating the flexibility and  
565 diversity of our data sources. This flexibility allows for a wide range of potential applications and  
566 extends our affordance memory's scalability to a greater extent.

### 567 **B.4 Affordance Memory Statistics**

568 The statistics of our affordance memory can be found in Table 5.

| Task Name             | Icon                                                                              | Data Source | Size |
|-----------------------|-----------------------------------------------------------------------------------|-------------|------|
| Open the drawer       |  | DROID       | 30   |
| Close the drawer      |  | DROID       | 20   |
| Open the cabinet      |  | DROID       | 12   |
| Close the cabinet     |  | DROID       | 6    |
| Open the microwave    |  | DROID       | 42   |
| Close the microwave   |  | DROID       | 10   |
| Open the dishwasher   |  | Custom      | 10   |
| Open the refrigerator |  | Custom      | 20   |
| Open the trashcan     |  | Custom      | 20   |
| Pickup the pot        |  | DROID       | 11   |
| Pickup the mug        |  | HOI4D       | 149  |
| Pickup the bowl       |  | HOI4D       | 252  |
| Pickup the bottle     |  | HOI4D       | 78   |
| Total                 | /                                                                                 | /           | 660  |

Table 5: Affordance memory statistics.

## C Implementation Details

### C.1 Feature Extraction Using Foundation Models

We use different foundation models as visual feature extractors, including:

- **Stable Diffusion (SD)** [46]. As illustrated in [51], given an original image  $x_0$ , we first add noise of time step  $t$  to it to move it to distribution  $x_t$ , and then feed it to the stable diffusion network  $f_\theta$  along with  $t$  for denoising to extract the intermediate layer activations as the diffusion features (DIFT). We use the same configuration as in [51].
- **DINOv2** [55]. Extracting DINOv2 features is implemented by feeding the original image to the DINOv2 model and extracting the intermediate layer activations of DINOv2 ViT during the feed-forward process.
- **SD-DINOv2** [52]. As in [52], we first extract SD features and DINOv2 features and then do L2 normalization on them to align their scales and distributions. After that, we concatenate these two features together to get the SD-DINOv2 feature.
- **CLIP** [45]. Similar to DINOv2, We extract dense CLIP features by utilizing the intermediate layer activations of CLIP ViT.

### C.2 IMD Metric Calculation

As in [56], Instance Matching Distance (IMD) is originally proposed to examine pose prediction accuracy. Given a source image  $I^S$  and a target image  $I^T$ , their normalized and masked feature maps  $F^S$  and  $F^T$ , and a source instance mask  $M^S$ , the IMD metric is defined as:

$$\text{IMD}(I^S, I^T, M^S) = \sum_{p \in M^S} \|F^S(p) - \text{NN}(F^S(p), F^T)\|_2, \quad (3)$$

where  $p$  denotes a pixel within the source instance mask,  $F^S(p)$  is the source feature vector at pixel  $p$ , and  $\text{NN}(F^S(p), F^T)$  denotes the nearest neighbor vector in the target feature map  $F^T$  with respect to the source feature vector. IMD measures the similarity of two images via the average feature distance of corresponding pixels [56]. Using IMD in the geometrical retrieval stage, we can accurately retrieve the demonstration where the object is oriented in the most similar way as in the observation.

### C.3 Baseline Methods

- **Where2Act** [14] is designed for articulated object manipulation only, which takes an object point cloud as input and predicts point-wise actionability scores, action proposals, and action scores with three separate models. Another drawback of this method is that it processes the point cloud in a task-agnostic way, leading to ambiguity of the generated affordance. We adopt it to the evaluation tasks by 1) randomly sampling the contact point from the predicted top-5 actionable points, 2) proposing 100 actions using the action proposal model, and 3) selecting the action with the highest action score.
- **VRB** [12] predicts the contact point and direction only on 2D images. To make it applicable in real manipulation tasks, we lift the estimated 2D affordance to 3D using our proposed sampling-based affordance lifting module.
- **Robo-ABC** [44] is initially designed for object grasping only, where only the contact point of a source demonstration retrieved by CLIP [45] feature similarity is transferred on the 2D image, followed by AnyGrasp [17] for grasp pose selection. For a fair comparison, we feed it with our collected affordance memory. To extend it for articulated objects, we use the proposed 2D affordance transfer module to transfer both the contact point and post direction. Subsequently, we follow the same procedure as in our method to lift 2D affordance to 3D.

## D Experiment Details

In the simulation, we utilize a flying Franka Panda gripper for simplicity. We utilize cuRobo [19] motion planner for position control of the gripper.

In the real world, we adopt two different robotic systems. In the Franka Emika robotic arm setting, we leverage an on-hand RealSense D415 camera for RGBD perception and utilize *MoveIt!* [18] motion planner for the transformation from the target end-effector pose to joint position trajectories. In the Unitree robot dog setting, we leverage a Unitree B1 dog with a Z1 arm, along with a Robotiq 2F-85 parallel gripper. The RealSense D415 camera is also on-hand mounted, and we control the arm using the Z1 SDK for delta cartesian-space control.

For grasp generation, we utilize AnyGrasp [17] to produce grasp proposals, along with GSNet [16] with a relatively low graspness score threshold and collision threshold for more dense grasp proposals in case there is no grasp pose close enough.

## E Downstream Application Details

### E.1 Training ACT Policy

For policy distillation, we utilize an ACT policy [30] to perform imitation learning from our self-collected demonstrations. ACT is based on CVAE Transformer architecture and adopts the idea of action chunking to mitigate compounding errors that are common in behavior cloning (BC). More details can be found in their original paper [30].

We use 5 RGB views ( $5 \times 640 \times 480 \times 3$ ) and the robot’s proprioception as observation. We set the chunk size to 60, and the latent space dimension to 512. We use L1 loss plus KL divergence regularization for supervision. The number of training iterations is set to 200K, and we set the learning rate to  $1 \times 10^{-5}$  and batch size to 8.

### E.2 One-Shot Visual Imitation Details

For one-shot visual imitation conditioned on human preference, we pick out demonstrations either from our own in-domain demonstrations or from out-of-domain cartoon images (*Tom and Jerry* in this case). We ground and choose the first frame of interaction for  $I^S$  and use the custom data annotation method for affordance extraction. We then skip the hierarchical retrieval step and directly use these chosen demonstrations for affordance transfer and lifting, followed by 3D affordance execution.

### 638 **E.3 LLM/VLM Integration Details**

639 For LLM/VLM integration, we utilize GPT-4V (gpt-4-vision-preview) [64] for task decomposi-  
640 tion and scene understanding. We also use Grounded-SAM [65] for object detection and segmentation  
641 to produce 3D bounding boxes of objects in the scene.

642 Specifically, we define 3 basic primitives: `grasp()`, `move_to()`, and `release()` for VLM output.  
643 Note that these three primitives do not involve heuristics on specific object manipulation. Other than  
644 these primitives, when the VLM finds out there are relevant demonstrations in the affordance memory,  
645 it will schedule the proposed RAM system as a retrieval-augmented module to perform the action as  
646 a whole, followed by other defined primitives.

647 An example of our prompt and the VLM output is shown in Fig. 7.

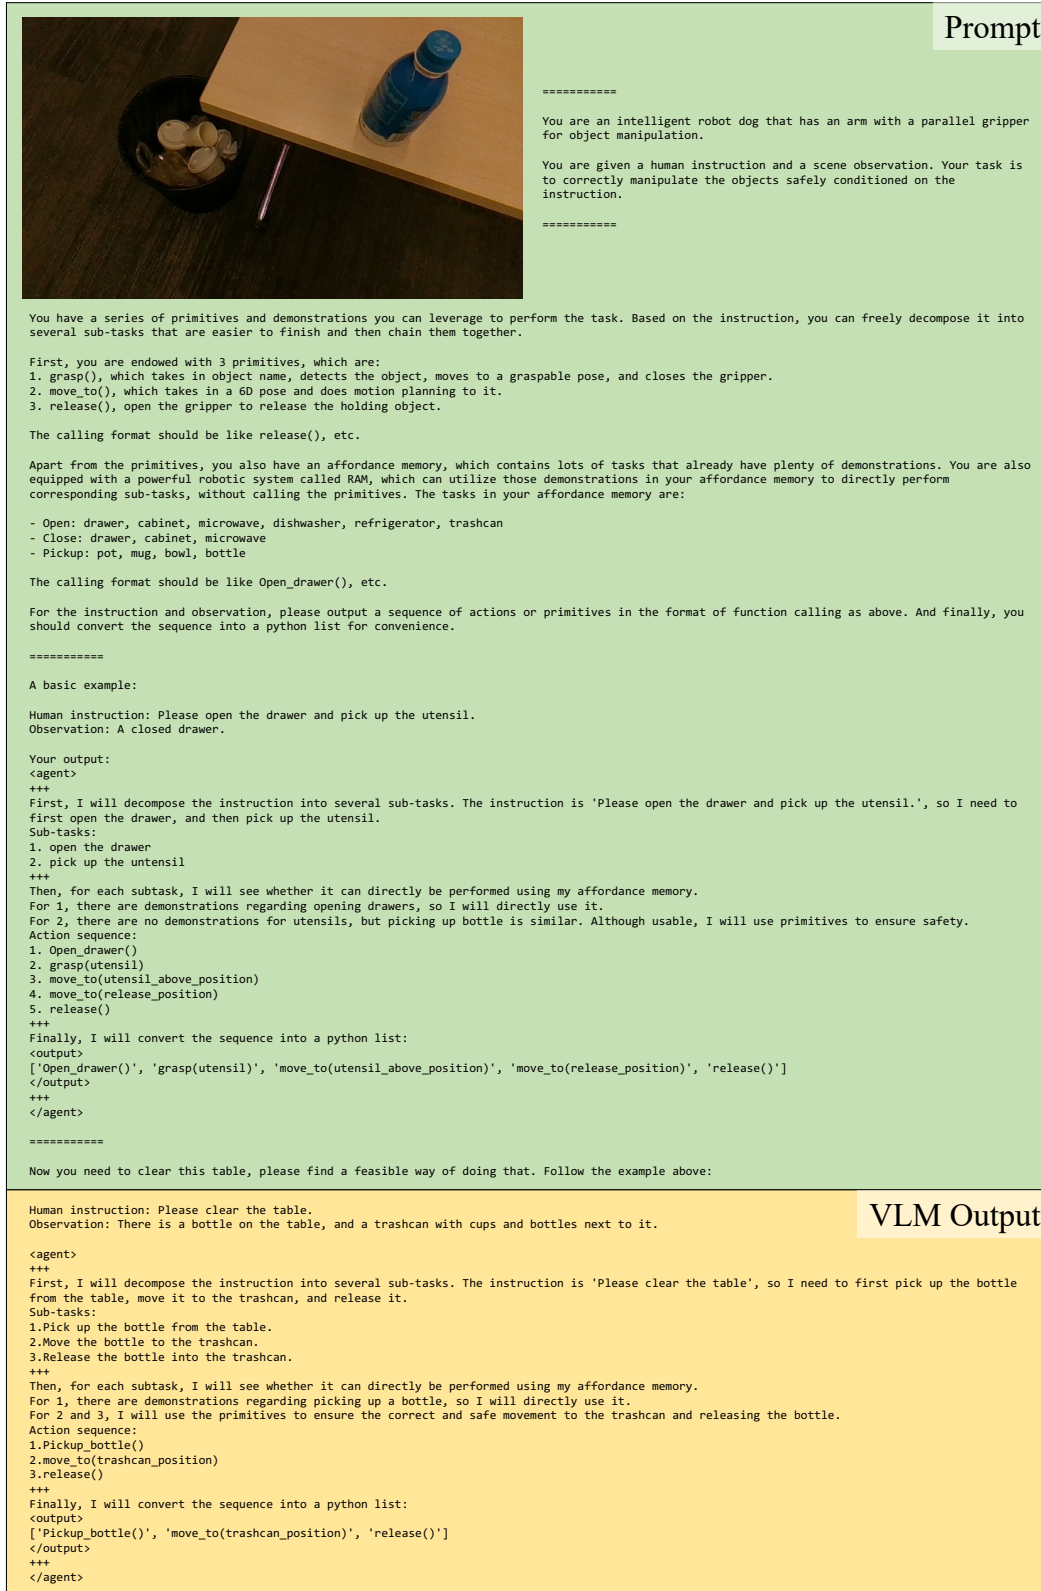

Figure 7: Example prompt and VLM outputs of our LLM/VLM integration system.
